# Supplementary material for: Possible Molecular Mechanisms Underlying the Decrease in the Antibacterial Activity of Protamine-like Proteins after Exposure of Mytilus galloprovincialis to Chromium and Mercury
Source: MDPI journal article supplement (doi:10.3390/ijms24119345), 2023-05-26
Supplement: s1 [file s1]

# Possible Molecular Mechanisms Underlying the Decrease in the Antibacterial Activity of Protamine-like Proteins after Exposure of *Mytilus galloprovincialis* to Chromium and Mercury

Carmela Marinaro <sup>1,†</sup>, Gennaro Lettieri <sup>1,†</sup>, Mariavittoria Verrillo <sup>2</sup>, Michela Morelli <sup>1</sup>, Federica Carraturo <sup>1</sup>, Marco Guida <sup>1</sup> and Marina Piscopo <sup>1,\*</sup>

<sup>1</sup> Department of Biology, University of Naples Federico II, 80126 Napoli, Italy; marco.guida@unina.it (M.G.)

<sup>2</sup> Department of Agricultural Sciences, Interdepartmental Research Centre of Nuclear Magnetic Resonance for the Environment, AgriFood and New Materials (CERMANU), University of Naples Federico II, 80055 Portici, Italy; mariavittoria.verrillo@unina.it

\* Correspondence: marina.piscopo@unina.it

† These authors contributed equally to this work.

Multiple comparisons performed with Tukey's test following two-way ANOVA on HgCl<sub>2</sub> MIC. ns = not significance; \*\*\*\* =  $p$ -value  $\leq 0.001$ .

| Tukey's multiple comparisons test               | Mean Diff. | 95.00% CI of diff. | Summary | Adjusted P Value |
|-------------------------------------------------|------------|--------------------|---------|------------------|
| <b><i>Escherichia coli</i> ATCC 35218</b>       |            |                    |         |                  |
| Unexposed vs. 1 pM Hg                           | -0.30      | -1.773 to 1.173    | ns      | 0.9907           |
| Unexposed vs. 10 pM Hg                          | -5.13      | -6.607 to -3.660   | ****    | <0.0001          |
| Unexposed vs. 100 pM Hg                         | -47.90     | -49.37 to -46.43   | ****    | <0.0001          |
| Unexposed vs. Ampicilline                       | 26.90      | 25.43 to 28.37     | ****    | <0.0001          |
| Unexposed vs. Tetraciclone                      | 26.50      | 25.03 to 27.97     | ****    | <0.0001          |
| 1 pM Hg vs. 10 pM Hg                            | -4.83      | -6.307 to -3.360   | ****    | <0.0001          |
| 1 pM Hg vs. 100 pM Hg                           | -47.60     | -49.07 to -46.13   | ****    | <0.0001          |
| 1 pM Hg vs. Ampicilline                         | 27.20      | 25.73 to 28.67     | ****    | <0.0001          |
| 1 pM Hg vs. Tetraciclone                        | 26.80      | 25.33 to 28.27     | ****    | <0.0001          |
| 10 pM Hg vs. 100 pM Hg                          | -42.77     | -44.24 to -41.29   | ****    | <0.0001          |
| 10 pM Hg vs. Ampicilline                        | 32.03      | 30.56 to 33.51     | ****    | <0.0001          |
| 10 pM Hg vs. Tetraciclone                       | 31.63      | 30.16 to 33.11     | ****    | <0.0001          |
| 100 pM Hg vs. Ampicilline                       | 74.80      | 73.33 to 76.27     | ****    | <0.0001          |
| 100 pM Hg vs. Tetraciclone                      | 74.40      | 72.93 to 75.87     | ****    | <0.0001          |
| Ampicilline vs. Tetraciclone                    | -0.40      | -1.873 to 1.073    | ns      | 0.9666           |
| <b><i>Pseudomonas aeruginosa</i> ATCC 27355</b> |            |                    |         |                  |
| Unexposed vs. 1 pM Hg                           | -1.07      | -2.540 to 0.4065   | ns      | 0.2856           |
| Unexposed vs. 10 pM Hg                          | -6.93      | -8.407 to -5.460   | ****    | <0.0001          |
| Unexposed vs. 100 pM Hg                         | -31.57     | -33.04 to -30.09   | ****    | <0.0001          |
| Unexposed vs. Ampicilline                       | 22.93      | 21.46 to 24.41     | ****    | <0.0001          |
| Unexposed vs. Tetraciclone                      | 22.67      | 21.19 to 24.14     | ****    | <0.0001          |
| 1 pM Hg vs. 10 pM Hg                            | -5.87      | -7.340 to -4.393   | ****    | <0.0001          |
| 1 pM Hg vs. 100 pM Hg                           | -30.50     | -31.97 to -29.03   | ****    | <0.0001          |
| 1 pM Hg vs. Ampicilline                         | 24.00      | 22.53 to 25.47     | ****    | <0.0001          |
| 1 pM Hg vs. Tetraciclone                        | 23.73      | 22.26 to 25.21     | ****    | <0.0001          |
| 10 pM Hg vs. 100 pM Hg                          | -24.63     | -26.11 to -23.16   | ****    | <0.0001          |
| 10 pM Hg vs. Ampicilline                        | 29.87      | 28.39 to 31.34     | ****    | <0.0001          |
| 10 pM Hg vs. Tetraciclone                       | 29.60      | 28.13 to 31.07     | ****    | <0.0001          |
| 100 pM Hg vs. Ampicilline                       | 54.50      | 53.03 to 55.97     | ****    | <0.0001          |
| 100 pM Hg vs. Tetraciclone                      | 54.23      | 52.76 to 55.71     | ****    | <0.0001          |
| Ampicilline vs. Tetraciclone                    | -0.27      | -1.740 to 1.207    | ns      | 0.9946           |
| <b><i>Klebsiella pneumoniae</i> ATCC 700503</b> |            |                    |         |                  |
| Unexposed vs. 1 pM Hg                           | -2.80      | -4.273 to -1.327   | ****    | <0.0001          |
| Unexposed vs. 10 pM Hg                          | -6.87      | -8.340 to -5.393   | ****    | <0.0001          |
| Unexposed vs. 100 pM Hg                         | -16.17     | -17.64 to -14.69   | ****    | <0.0001          |
| Unexposed vs. Ampicilline                       | 23.97      | 22.49 to 25.44     | ****    | <0.0001          |
| Unexposed vs. Tetraciclone                      | 24.37      | 22.89 to 25.84     | ****    | <0.0001          |
| 1 pM Hg vs. 10 pM Hg                            | -4.07      | -5.540 to -2.593   | ****    | <0.0001          |
| 1 pM Hg vs. 100 pM Hg                           | -13.37     | -14.84 to -11.89   | ****    | <0.0001          |

|                             |       |                  |      |         |
|-----------------------------|-------|------------------|------|---------|
| 1 pM Hg vs. Ampicilline     | 26.77 | 25.29 to 28.24   | **** | <0.0001 |
| 1 pM Hg vs. Tetraciline     | 27.17 | 25.69 to 28.64   | **** | <0.0001 |
| 10 pM Hg vs. 100 pM Hg      | -9.30 | -10.77 to -7.827 | **** | <0.0001 |
| 10 pM Hg vs. Ampicilline    | 30.83 | 29.36 to 32.31   | **** | <0.0001 |
| 10 pM Hg vs. Tetraciline    | 31.23 | 29.76 to 32.71   | **** | <0.0001 |
| 100 pM Hg vs. Ampicilline   | 40.13 | 38.66 to 41.61   | **** | <0.0001 |
| 100 pM Hg vs. Tetraciline   | 40.53 | 39.06 to 42.01   | **** | <0.0001 |
| Ampicilline vs. Tetraciline | 0.40  | -1.073 to 1.873  | ns   | 0.9666  |

#### ***Staphylococcus aureus* ATCC 5538P**

|                             |        |                  |      |         |
|-----------------------------|--------|------------------|------|---------|
| Unexposed vs. 1 pM Hg       | -3.93  | -5.407 to -2.460 | **** | <0.0001 |
| Unexposed vs. 10 pM Hg      | -6.80  | -8.273 to -5.327 | **** | <0.0001 |
| Unexposed vs. 100 pM Hg     | -18.63 | -20.11 to -17.16 | **** | <0.0001 |
| Unexposed vs. Ampicilline   | 23.07  | 21.59 to 24.54   | **** | <0.0001 |
| Unexposed vs. Tetraciline   | 23.60  | 22.13 to 25.07   | **** | <0.0001 |
| 1 pM Hg vs. 10 pM Hg        | -2.87  | -4.340 to -1.393 | **** | <0.0001 |
| 1 pM Hg vs. 100 pM Hg       | -14.70 | -16.17 to -13.23 | **** | <0.0001 |
| 1 pM Hg vs. Ampicilline     | 27.00  | 25.53 to 28.47   | **** | <0.0001 |
| 1 pM Hg vs. Tetraciline     | 27.53  | 26.06 to 29.01   | **** | <0.0001 |
| 10 pM Hg vs. 100 pM Hg      | -11.83 | -13.31 to -10.36 | **** | <0.0001 |
| 10 pM Hg vs. Ampicilline    | 29.87  | 28.39 to 31.34   | **** | <0.0001 |
| 10 pM Hg vs. Tetraciline    | 30.40  | 28.93 to 31.87   | **** | <0.0001 |
| 100 pM Hg vs. Ampicilline   | 41.70  | 40.23 to 43.17   | **** | <0.0001 |
| 100 pM Hg vs. Tetraciline   | 42.23  | 40.76 to 43.71   | **** | <0.0001 |
| Ampicilline vs. Tetraciline | 0.53   | -0.9399 to 2.007 | ns   | 0.8929  |

#### ***Enterococcus faecalis* ATCC 29212**

|                             |        |                  |      |         |
|-----------------------------|--------|------------------|------|---------|
| Unexposed vs. 1 pM Hg       | -4.10  | -5.573 to -2.627 | **** | <0.0001 |
| Unexposed vs. 10 pM Hg      | -8.10  | -9.573 to -6.627 | **** | <0.0001 |
| Unexposed vs. 100 pM Hg     | -16.00 | -17.47 to -14.53 | **** | <0.0001 |
| Unexposed vs. Ampicilline   | 21.03  | 19.56 to 22.51   | **** | <0.0001 |
| Unexposed vs. Tetraciline   | 21.50  | 20.03 to 22.97   | **** | <0.0001 |
| 1 pM Hg vs. 10 pM Hg        | -4.00  | -5.473 to -2.527 | **** | <0.0001 |
| 1 pM Hg vs. 100 pM Hg       | -11.90 | -13.37 to -10.43 | **** | <0.0001 |
| 1 pM Hg vs. Ampicilline     | 25.13  | 23.66 to 26.61   | **** | <0.0001 |
| 1 pM Hg vs. Tetraciline     | 25.60  | 24.13 to 27.07   | **** | <0.0001 |
| 10 pM Hg vs. 100 pM Hg      | -7.90  | -9.373 to -6.427 | **** | <0.0001 |
| 10 pM Hg vs. Ampicilline    | 29.13  | 27.66 to 30.61   | **** | <0.0001 |
| 10 pM Hg vs. Tetraciline    | 29.60  | 28.13 to 31.07   | **** | <0.0001 |
| 100 pM Hg vs. Ampicilline   | 37.03  | 35.56 to 38.51   | **** | <0.0001 |
| 100 pM Hg vs. Tetraciline   | 37.50  | 36.03 to 38.97   | **** | <0.0001 |
| Ampicilline vs. Tetraciline | 0.47   | -1.007 to 1.940  | ns   | 0.9365  |

Multiple comparisons performed with Tukey's test following two-way ANOVA on Cr(VI) MIC. ns = not significance; \* =  $p$ -value  $\leq 0.05$ ; \*\*\*\* =  $p$ -value  $\leq 0.001$ .

| Tukey's multiple comparisons test        | Mean Diff. | 95.00% CI of diff.  | Summary | Adjusted P Value |
|------------------------------------------|------------|---------------------|---------|------------------|
| <b>Escherichia coli ATCC 35218</b>       |            |                     |         |                  |
| Unexposed vs. 1 nM Cr(VI)                | -0.567     | -1.492 to 0.3591    | ns      | 0.4723           |
| Unexposed vs. 10 nM Cr(VI)               | -3.1       | -4.026 to -2.174    | ****    | <0.0001          |
| Unexposed vs. 100 nM Cr(VI)              | -49        | -49.93 to -48.07    | ****    | <0.0001          |
| Unexposed vs. Ampicilline                | 28.27      | 27.34 to 29.19      | ****    | <0.0001          |
| Unexposed vs. Tetraciline                | 27.97      | 27.04 to 28.89      | ****    | <0.0001          |
| 1 nM Cr(VI) vs. 10 nM Cr(VI)             | -2.533     | -3.459 to -1.608    | ****    | <0.0001          |
| 1 nM Cr(VI) vs. 100 nM Cr(VI)            | -48.43     | -49.36 to -47.51    | ****    | <0.0001          |
| 1 nM Cr(VI) vs. Ampicilline              | 28.83      | 27.91 to 29.76      | ****    | <0.0001          |
| 1 nM Cr(VI) vs. Tetraciline              | 28.53      | 27.61 to 29.46      | ****    | <0.0001          |
| 10 nM Cr(VI) vs. 100 nM Cr(VI)           | -45.9      | -46.83 to -44.97    | ****    | <0.0001          |
| 10 nM Cr(VI) vs. Ampicilline             | 31.37      | 30.44 to 32.29      | ****    | <0.0001          |
| 10 nM Cr(VI) vs. Tetraciline             | 31.07      | 30.14 to 31.99      | ****    | <0.0001          |
| 100 nM Cr(VI) vs. Ampicilline            | 77.27      | 76.34 to 78.19      | ****    | <0.0001          |
| 100 nM Cr(VI) vs. Tetraciline            | 76.97      | 76.04 to 77.89      | ****    | <0.0001          |
| Ampicilline vs. Tetraciline              | -0.3       | -1.226 to 0.6257    | ns      | 0.9304           |
| <b>Pseudomonas aeruginosa ATCC 27355</b> |            |                     |         |                  |
| Unexposed vs. 1 nM Cr(VI)                | -0.933     | -1.859 to -0.007608 | *       | 0.047            |
| Unexposed vs. 10 nM Cr(VI)               | -6.433     | -7.359 to -5.508    | ****    | <0.0001          |
| Unexposed vs. 100 nM Cr(VI)              | -19.33     | -20.26 to -18.41    | ****    | <0.0001          |
| Unexposed vs. Ampicilline                | 24         | 23.07 to 24.93      | ****    | <0.0001          |
| Unexposed vs. Tetraciline                | 23.63      | 22.71 to 24.56      | ****    | <0.0001          |
| 1 nM Cr(VI) vs. 10 nM Cr(VI)             | -5.5       | -6.426 to -4.574    | ****    | <0.0001          |
| 1 nM Cr(VI) vs. 100 nM Cr(VI)            | -18.4      | -19.33 to -17.47    | ****    | <0.0001          |
| 1 nM Cr(VI) vs. Ampicilline              | 24.93      | 24.01 to 25.86      | ****    | <0.0001          |
| 1 nM Cr(VI) vs. Tetraciline              | 24.57      | 23.64 to 25.49      | ****    | <0.0001          |
| 10 nM Cr(VI) vs. 100 nM Cr(VI)           | -12.9      | -13.83 to -11.97    | ****    | <0.0001          |
| 10 nM Cr(VI) vs. Ampicilline             | 30.43      | 29.51 to 31.36      | ****    | <0.0001          |
| 10 nM Cr(VI) vs. Tetraciline             | 30.07      | 29.14 to 30.99      | ****    | <0.0001          |
| 100 nM Cr(VI) vs. Ampicilline            | 43.33      | 42.41 to 44.26      | ****    | <0.0001          |
| 100 nM Cr(VI) vs. Tetraciline            | 42.97      | 42.04 to 43.89      | ****    | <0.0001          |
| Ampicilline vs. Tetraciline              | -0.367     | -1.292 to 0.5591    | ns      | 0.851            |
| <b>Klebsiella pneumoniae ATCC 700503</b> |            |                     |         |                  |
| Unexposed vs. 1 nM Cr(VI)                | -1.1       | -2.026 to -0.1743   | *       | 0.011            |
| Unexposed vs. 10 nM Cr(VI)               | -3.567     | -4.492 to -2.641    | ****    | <0.0001          |
| Unexposed vs. 100 nM Cr(VI)              | -13.9      | -14.83 to -12.97    | ****    | <0.0001          |
| Unexposed vs. Ampicilline                | 25         | 24.07 to 25.93      | ****    | <0.0001          |
| Unexposed vs. Tetraciline                | 24.97      | 24.04 to 25.89      | ****    | <0.0001          |
| 1 nM Cr(VI) vs. 10 nM Cr(VI)             | -2.467     | -3.392 to -1.541    | ****    | <0.0001          |

|                                |        |                   |      |         |
|--------------------------------|--------|-------------------|------|---------|
| 1 nM Cr(VI) vs. 100 nM Cr(VI)  | -12.8  | -13.73 to -11.87  | **** | <0.0001 |
| 1 nM Cr(VI) vs. Ampicilline    | 26.1   | 25.17 to 27.03    | **** | <0.0001 |
| 1 nM Cr(VI) vs. Tetraciclina   | 26.07  | 25.14 to 26.99    | **** | <0.0001 |
| 10 nM Cr(VI) vs. 100 nM Cr(VI) | -10.33 | -11.26 to -9.408  | **** | <0.0001 |
| 10 nM Cr(VI) vs. Ampicilline   | 28.57  | 27.64 to 29.49    | **** | <0.0001 |
| 10 nM Cr(VI) vs. Tetraciclina  | 28.53  | 27.61 to 29.46    | **** | <0.0001 |
| 100 nM Cr(VI) vs. Ampicilline  | 38.9   | 37.97 to 39.83    | **** | <0.0001 |
| 100 nM Cr(VI) vs. Tetraciclina | 38.87  | 37.94 to 39.79    | **** | <0.0001 |
| Ampicilline vs. Tetraciclina   | -0.033 | -0.9591 to 0.8924 | ns   | >0.9999 |

#### ***Staphylococcus aureus* ATCC 5538P**

|                                |        |                   |      |         |
|--------------------------------|--------|-------------------|------|---------|
| Unexposed vs. 1 nM Cr(VI)      | -1.033 | -1.959 to -0.1076 | *    | 0.0201  |
| Unexposed vs. 10 nM Cr(VI)     | -4.1   | -5.026 to -3.174  | **** | <0.0001 |
| Unexposed vs. 100 nM Cr(VI)    | -18.37 | -19.29 to -17.44  | **** | <0.0001 |
| Unexposed vs. Ampicilline      | 21.63  | 20.71 to 22.56    | **** | <0.0001 |
| Unexposed vs. Tetraciclina     | 21.63  | 20.71 to 22.56    | **** | <0.0001 |
| 1 nM Cr(VI) vs. 10 nM Cr(VI)   | -3.067 | -3.992 to -2.141  | **** | <0.0001 |
| 1 nM Cr(VI) vs. 100 nM Cr(VI)  | -17.33 | -18.26 to -16.41  | **** | <0.0001 |
| 1 nM Cr(VI) vs. Ampicilline    | 22.67  | 21.74 to 23.59    | **** | <0.0001 |
| 1 nM Cr(VI) vs. Tetraciclina   | 22.67  | 21.74 to 23.59    | **** | <0.0001 |
| 10 nM Cr(VI) vs. 100 nM Cr(VI) | -14.27 | -15.19 to -13.34  | **** | <0.0001 |
| 10 nM Cr(VI) vs. Ampicilline   | 25.73  | 24.81 to 26.66    | **** | <0.0001 |
| 10 nM Cr(VI) vs. Tetraciclina  | 25.73  | 24.81 to 26.66    | **** | <0.0001 |
| 100 nM Cr(VI) vs. Ampicilline  | 40     | 39.07 to 40.93    | **** | <0.0001 |
| 100 nM Cr(VI) vs. Tetraciclina | 40     | 39.07 to 40.93    | **** | <0.0001 |
| Ampicilline vs. Tetraciclina   | 0      | -0.9257 to 0.9257 | ns   | >0.9999 |

#### ***Enterococcus faecalis* ATCC 29212**

|                                |        |                   |      |         |
|--------------------------------|--------|-------------------|------|---------|
| Unexposed vs. 1 nM Cr(VI)      | -0.7   | -1.626 to 0.2257  | ns   | 0.2414  |
| Unexposed vs. 10 nM Cr(VI)     | -5.733 | -6.659 to -4.808  | **** | <0.0001 |
| Unexposed vs. 100 nM Cr(VI)    | -12.67 | -13.59 to -11.74  | **** | <0.0001 |
| Unexposed vs. Ampicilline      | 22.37  | 21.44 to 23.29    | **** | <0.0001 |
| Unexposed vs. Tetraciclina     | 23.2   | 22.27 to 24.13    | **** | <0.0001 |
| 1 nM Cr(VI) vs. 10 nM Cr(VI)   | -5.033 | -5.959 to -4.108  | **** | <0.0001 |
| 1 nM Cr(VI) vs. 100 nM Cr(VI)  | -11.97 | -12.89 to -11.04  | **** | <0.0001 |
| 1 nM Cr(VI) vs. Ampicilline    | 23.07  | 22.14 to 23.99    | **** | <0.0001 |
| 1 nM Cr(VI) vs. Tetraciclina   | 23.9   | 22.97 to 24.83    | **** | <0.0001 |
| 10 nM Cr(VI) vs. 100 nM Cr(VI) | -6.933 | -7.859 to -6.008  | **** | <0.0001 |
| 10 nM Cr(VI) vs. Ampicilline   | 28.1   | 27.17 to 29.03    | **** | <0.0001 |
| 10 nM Cr(VI) vs. Tetraciclina  | 28.93  | 28.01 to 29.86    | **** | <0.0001 |
| 100 nM Cr(VI) vs. Ampicilline  | 35.03  | 34.11 to 35.96    | **** | <0.0001 |
| 100 nM Cr(VI) vs. Tetraciclina | 35.87  | 34.94 to 36.79    | **** | <0.0001 |
| Ampicilline vs. Tetraciclina   | 0.8333 | -0.09239 to 1.759 | ns   | 0.1011  |

Multiple comparisons performed with Tukey's test following two-way ANOVA on HgCl<sub>2</sub> MBC. ns = not significance; \* =  $p$ -value  $\leq 0.05$ ; \*\*\*\* =  $p$ -value  $\leq 0.001$ .

| Tukey's multiple comparisons test               | Mean Diff. | 95.00% CI of diff. | Summary | Adjusted P Value |
|-------------------------------------------------|------------|--------------------|---------|------------------|
| <b><i>Escherichia coli</i> ATCC 35218</b>       |            |                    |         |                  |
| Unexposed vs. 1 pM Hg                           | -0.2       | -1.694 to 1.294    | ns      | 0.9987           |
| Unexposed vs. 10 pM Hg                          | -4.867     | -6.361 to -3.372   | ****    | <0.0001          |
| Unexposed vs. 100 pM Hg                         | -47.33     | -48.83 to -45.84   | ****    | <0.0001          |
| Unexposed vs. Ampicilline                       | 27.13      | 25.64 to 28.63     | ****    | <0.0001          |
| Unexposed vs. Tetraciclone                      | 27.13      | 25.64 to 28.63     | ****    | <0.0001          |
| 1 pM Hg vs. 10 pM Hg                            | -4.667     | -6.161 to -3.172   | ****    | <0.0001          |
| 1 pM Hg vs. 100 pM Hg                           | -47.13     | -48.63 to -45.64   | ****    | <0.0001          |
| 1 pM Hg vs. Ampicilline                         | 27.33      | 25.84 to 28.83     | ****    | <0.0001          |
| 1 pM Hg vs. Tetraciclone                        | 27.33      | 25.84 to 28.83     | ****    | <0.0001          |
| 10 pM Hg vs. 100 pM Hg                          | -42.47     | -43.96 to -40.97   | ****    | <0.0001          |
| 10 pM Hg vs. Ampicilline                        | 32         | 30.51 to 33.49     | ****    | <0.0001          |
| 10 pM Hg vs. Tetraciclone                       | 32         | 30.51 to 33.49     | ****    | <0.0001          |
| 100 pM Hg vs. Ampicilline                       | 74.47      | 72.97 to 75.96     | ****    | <0.0001          |
| 100 pM Hg vs. Tetraciclone                      | 74.47      | 72.97 to 75.96     | ****    | <0.0001          |
| Ampicilline vs. Tetraciclone                    | 0          | -1.494 to 1.494    | ns      | >0.9999          |
| <b><i>Pseudomonas aeruginosa</i> ATCC 27355</b> |            |                    |         |                  |
| Unexposed vs. 1 pM Hg                           | -1.667     | -3.161 to -0.1725  | *       | 0.0203           |
| Unexposed vs. 10 pM Hg                          | -7.233     | -8.728 to -5.739   | ****    | <0.0001          |
| Unexposed vs. 100 pM Hg                         | -31.57     | -33.06 to -30.07   | ****    | <0.0001          |
| Unexposed vs. Ampicilline                       | 23.2       | 21.71 to 24.69     | ****    | <0.0001          |
| Unexposed vs. Tetraciclone                      | 22.93      | 21.44 to 24.43     | ****    | <0.0001          |
| 1 pM Hg vs. 10 pM Hg                            | -5.567     | -7.061 to -4.072   | ****    | <0.0001          |
| 1 pM Hg vs. 100 pM Hg                           | -29.9      | -31.39 to -28.41   | ****    | <0.0001          |
| 1 pM Hg vs. Ampicilline                         | 24.87      | 23.37 to 26.36     | ****    | <0.0001          |
| 1 pM Hg vs. Tetraciclone                        | 24.6       | 23.11 to 26.09     | ****    | <0.0001          |
| 10 pM Hg vs. 100 pM Hg                          | -24.33     | -25.83 to -22.84   | ****    | <0.0001          |
| 10 pM Hg vs. Ampicilline                        | 30.43      | 28.94 to 31.93     | ****    | <0.0001          |
| 10 pM Hg vs. Tetraciclone                       | 30.17      | 28.67 to 31.66     | ****    | <0.0001          |
| 100 pM Hg vs. Ampicilline                       | 54.77      | 53.27 to 56.26     | ****    | <0.0001          |
| 100 pM Hg vs. Tetraciclone                      | 54.5       | 53.01 to 55.99     | ****    | <0.0001          |
| Ampicilline vs. Tetraciclone                    | -0.267     | -1.761 to 1.228    | ns      | 0.9949           |
| <b><i>Klebsiella pneumoniae</i> ATCC 700503</b> |            |                    |         |                  |
| Unexposed vs. 1 pM Hg                           | -2.567     | -4.061 to -1.072   | ****    | <0.0001          |
| Unexposed vs. 10 pM Hg                          | -6.5       | -7.994 to -5.006   | ****    | <0.0001          |
| Unexposed vs. 100 pM Hg                         | -16.97     | -18.46 to -15.47   | ****    | <0.0001          |
| Unexposed vs. Ampicilline                       | 24.43      | 22.94 to 25.93     | ****    | <0.0001          |
| Unexposed vs. Tetraciclone                      | 24.77      | 23.27 to 26.26     | ****    | <0.0001          |
| 1 pM Hg vs. 10 pM Hg                            | -3.933     | -5.428 to -2.439   | ****    | <0.0001          |
| 1 pM Hg vs. 100 pM Hg                           | -14.4      | -15.89 to -12.91   | ****    | <0.0001          |

|                              |        |                  |      |         |
|------------------------------|--------|------------------|------|---------|
| 1 pM Hg vs. Ampicilline      | 27     | 25.51 to 28.49   | **** | <0.0001 |
| 1 pM Hg vs. Tetraciclina     | 27.33  | 25.84 to 28.83   | **** | <0.0001 |
| 10 pM Hg vs. 100 pM Hg       | -10.47 | -11.96 to -8.972 | **** | <0.0001 |
| 10 pM Hg vs. Ampicilline     | 30.93  | 29.44 to 32.43   | **** | <0.0001 |
| 10 pM Hg vs. Tetraciclina    | 31.27  | 29.77 to 32.76   | **** | <0.0001 |
| 100 pM Hg vs. Ampicilline    | 41.4   | 39.91 to 42.89   | **** | <0.0001 |
| 100 pM Hg vs. Tetraciclina   | 41.73  | 40.24 to 43.23   | **** | <0.0001 |
| Ampicilline vs. Tetraciclina | 0.3333 | -1.161 to 1.828  | ns   | 0.9859  |

#### ***Staphylococcus aureus* ATCC 5538P**

|                              |        |                  |      |         |
|------------------------------|--------|------------------|------|---------|
| Unexposed vs. 1 pM Hg        | -4.033 | -5.528 to -2.539 | **** | <0.0001 |
| Unexposed vs. 10 pM Hg       | -7.267 | -8.761 to -5.772 | **** | <0.0001 |
| Unexposed vs. 100 pM Hg      | -19.07 | -20.56 to -17.57 | **** | <0.0001 |
| Unexposed vs. Ampicilline    | 23.7   | 22.21 to 25.19   | **** | <0.0001 |
| Unexposed vs. Tetraciclina   | 24.33  | 22.84 to 25.83   | **** | <0.0001 |
| 1 pM Hg vs. 10 pM Hg         | -3.233 | -4.728 to -1.739 | **** | <0.0001 |
| 1 pM Hg vs. 100 pM Hg        | -15.03 | -16.53 to -13.54 | **** | <0.0001 |
| 1 pM Hg vs. Ampicilline      | 27.73  | 26.24 to 29.23   | **** | <0.0001 |
| 1 pM Hg vs. Tetraciclina     | 28.37  | 26.87 to 29.86   | **** | <0.0001 |
| 10 pM Hg vs. 100 pM Hg       | -11.8  | -13.29 to -10.31 | **** | <0.0001 |
| 10 pM Hg vs. Ampicilline     | 30.97  | 29.47 to 32.46   | **** | <0.0001 |
| 10 pM Hg vs. Tetraciclina    | 31.6   | 30.11 to 33.09   | **** | <0.0001 |
| 100 pM Hg vs. Ampicilline    | 42.77  | 41.27 to 44.26   | **** | <0.0001 |
| 100 pM Hg vs. Tetraciclina   | 43.4   | 41.91 to 44.89   | **** | <0.0001 |
| Ampicilline vs. Tetraciclina | 0.6333 | -0.8609 to 2.128 | ns   | 0.8114  |

#### ***Enterococcus faecalis* ATCC 29212**

|                              |       |                  |      |         |
|------------------------------|-------|------------------|------|---------|
| Unexposed vs. 1 pM Hg        | -4.7  | -6.194 to -3.206 | **** | <0.0001 |
| Unexposed vs. 10 pM Hg       | -8.1  | -9.594 to -6.606 | **** | <0.0001 |
| Unexposed vs. 100 pM Hg      | -16.4 | -17.89 to -14.91 | **** | <0.0001 |
| Unexposed vs. Ampicilline    | 21.57 | 20.07 to 23.06   | **** | <0.0001 |
| Unexposed vs. Tetraciclina   | 22.07 | 20.57 to 23.56   | **** | <0.0001 |
| 1 pM Hg vs. 10 pM Hg         | -3.4  | -4.894 to -1.906 | **** | <0.0001 |
| 1 pM Hg vs. 100 pM Hg        | -11.7 | -13.19 to -10.21 | **** | <0.0001 |
| 1 pM Hg vs. Ampicilline      | 26.27 | 24.77 to 27.76   | **** | <0.0001 |
| 1 pM Hg vs. Tetraciclina     | 26.77 | 25.27 to 28.26   | **** | <0.0001 |
| 10 pM Hg vs. 100 pM Hg       | -8.3  | -9.794 to -6.806 | **** | <0.0001 |
| 10 pM Hg vs. Ampicilline     | 29.67 | 28.17 to 31.16   | **** | <0.0001 |
| 10 pM Hg vs. Tetraciclina    | 30.17 | 28.67 to 31.66   | **** | <0.0001 |
| 100 pM Hg vs. Ampicilline    | 37.97 | 36.47 to 39.46   | **** | <0.0001 |
| 100 pM Hg vs. Tetraciclina   | 38.47 | 36.97 to 39.96   | **** | <0.0001 |
| Ampicilline vs. Tetraciclina | 0.5   | -0.9942 to 1.994 | ns   | 0.9209  |

Multiple comparisons performed with Tukey's test following two-way ANOVA on Cr(VI) MBC. ns = not significance; \* =  $p$ -value  $\leq 0.05$ ; \*\* =  $p$ -value  $\leq 0.01$ ; \*\*\*\* =  $p$ -value  $\leq 0.001$ .

| Tukey's multiple comparisons test               | Mean Diff. | 95.00% CI of diff. | Summary | Adjusted P Value |
|-------------------------------------------------|------------|--------------------|---------|------------------|
| <b><i>Escherichia coli</i> ATCC 35218</b>       |            |                    |         |                  |
| Unexposed vs. 1 nM Cr(VI)                       | -3.067     | -5.121 to -1.013   | ***     | 0.0006           |
| Unexposed vs. 10 nM Cr(VI)                      | -4.933     | -6.987 to -2.879   | ****    | <0.0001          |
| Unexposed vs. 100 nM Cr(VI)                     | -52.93     | -54.99 to -50.88   | ****    | <0.0001          |
| Unexposed vs. Ampicilline                       | 29.7       | 27.65 to 31.75     | ****    | <0.0001          |
| Unexposed vs. Tetraciline                       | 29.63      | 27.58 to 31.69     | ****    | <0.0001          |
| 1 nM Cr(VI) vs. 10 nM Cr(VI)                    | -1.867     | -3.921 to 0.1874   | ns      | 0.0955           |
| 1 nM Cr(VI) vs. 100 nM Cr(VI)                   | -49.87     | -51.92 to -47.81   | ****    | <0.0001          |
| 1 nM Cr(VI) vs. Ampicilline                     | 32.77      | 30.71 to 34.82     | ****    | <0.0001          |
| 1 nM Cr(VI) vs. Tetraciline                     | 32.7       | 30.65 to 34.75     | ****    | <0.0001          |
| 10 nM Cr(VI) vs. 100 nM Cr(VI)                  | -48        | -50.05 to -45.95   | ****    | <0.0001          |
| 10 nM Cr(VI) vs. Ampicilline                    | 34.63      | 32.58 to 36.69     | ****    | <0.0001          |
| 10 nM Cr(VI) vs. Tetraciline                    | 34.57      | 32.51 to 36.62     | ****    | <0.0001          |
| 100 nM Cr(VI) vs. Ampicilline                   | 82.63      | 80.58 to 84.69     | ****    | <0.0001          |
| 100 nM Cr(VI) vs. Tetraciline                   | 82.57      | 80.51 to 84.62     | ****    | <0.0001          |
| Ampicilline vs. Tetraciline                     | -0.067     | -2.121 to 1.987    | ns      | >0.9999          |
| <b><i>Pseudomonas aeruginosa</i> ATCC 27355</b> |            |                    |         |                  |
| Unexposed vs. 1 nM Cr(VI)                       | 2.633      | 0.5792 to 4.687    | **      | 0.0048           |
| Unexposed vs. 10 nM Cr(VI)                      | -2.367     | -4.421 to -0.3126  | *       | 0.0149           |
| Unexposed vs. 100 nM Cr(VI)                     | -26.6      | -28.65 to -24.55   | ****    | <0.0001          |
| Unexposed vs. Ampicilline                       | 28.47      | 26.41 to 30.52     | ****    | <0.0001          |
| Unexposed vs. Tetraciline                       | 28.53      | 26.48 to 30.59     | ****    | <0.0001          |
| 1 nM Cr(VI) vs. 10 nM Cr(VI)                    | -5         | -7.054 to -2.946   | ****    | <0.0001          |
| 1 nM Cr(VI) vs. 100 nM Cr(VI)                   | -29.23     | -31.29 to -27.18   | ****    | <0.0001          |
| 1 nM Cr(VI) vs. Ampicilline                     | 25.83      | 23.78 to 27.89     | ****    | <0.0001          |
| 1 nM Cr(VI) vs. Tetraciline                     | 25.9       | 23.85 to 27.95     | ****    | <0.0001          |
| 10 nM Cr(VI) vs. 100 nM Cr(VI)                  | -24.23     | -26.29 to -22.18   | ****    | <0.0001          |
| 10 nM Cr(VI) vs. Ampicilline                    | 30.83      | 28.78 to 32.89     | ****    | <0.0001          |
| 10 nM Cr(VI) vs. Tetraciline                    | 30.9       | 28.85 to 32.95     | ****    | <0.0001          |
| 100 nM Cr(VI) vs. Ampicilline                   | 55.07      | 53.01 to 57.12     | ****    | <0.0001          |
| 100 nM Cr(VI) vs. Tetraciline                   | 55.13      | 53.08 to 57.19     | ****    | <0.0001          |
| Ampicilline vs. Tetraciline                     | 0.0667     | -1.987 to 2.121    | ns      | >0.9999          |
| <b><i>Klebsiella pneumoniae</i> ATCC 700503</b> |            |                    |         |                  |
| Unexposed vs. 1 nM Cr(VI)                       | -1.133     | -3.187 to 0.9208   | ns      | 0.5861           |
| Unexposed vs. 10 nM Cr(VI)                      | -3.867     | -5.921 to -1.813   | ****    | <0.0001          |
| Unexposed vs. 100 nM Cr(VI)                     | -14.2      | -16.25 to -12.15   | ****    | <0.0001          |
| Unexposed vs. Ampicilline                       | 25.63      | 23.58 to 27.69     | ****    | <0.0001          |
| Unexposed vs. Tetraciline                       | 25.4       | 23.35 to 27.45     | ****    | <0.0001          |
| 1 nM Cr(VI) vs. 10 nM Cr(VI)                    | -2.733     | -4.787 to -0.6792  | **      | 0.003            |
| 1 nM Cr(VI) vs. 100 nM Cr(VI)                   | -13.07     | -15.12 to -11.01   | ****    | <0.0001          |



|                                |        |                  |      |         |
|--------------------------------|--------|------------------|------|---------|
| 1 nM Cr(VI) vs. Ampicilline    | 26.77  | 24.71 to 28.82   | **** | <0.0001 |
| 1 nM Cr(VI) vs. Tetraciline    | 26.53  | 24.48 to 28.59   | **** | <0.0001 |
| 10 nM Cr(VI) vs. 100 nM Cr(VI) | -10.33 | -12.39 to -8.279 | **** | <0.0001 |
| 10 nM Cr(VI) vs. Ampicilline   | 29.5   | 27.45 to 31.55   | **** | <0.0001 |
| 10 nM Cr(VI) vs. Tetraciline   | 29.27  | 27.21 to 31.32   | **** | <0.0001 |
| 100 nM Cr(VI) vs. Ampicilline  | 39.83  | 37.78 to 41.89   | **** | <0.0001 |
| 100 nM Cr(VI) vs. Tetraciline  | 39.6   | 37.55 to 41.65   | **** | <0.0001 |
| Ampicilline vs. Tetraciline    | -0.233 | -2.287 to 1.821  | ns   | 0.9994  |

#### ***Staphylococcus aureus* ATCC 5538P**

|                                |        |                  |      |         |
|--------------------------------|--------|------------------|------|---------|
| Unexposed vs. 1 nM Cr(VI)      | -1.733 | -3.787 to 0.3208 | ns   | 0.1453  |
| Unexposed vs. 10 nM Cr(VI)     | -3.633 | -5.687 to -1.579 | **** | <0.0001 |
| Unexposed vs. 100 nM Cr(VI)    | -18.53 | -20.59 to -16.48 | **** | <0.0001 |
| Unexposed vs. Ampicilline      | 22.43  | 20.38 to 24.49   | **** | <0.0001 |
| Unexposed vs. Tetraciline      | 22.3   | 20.25 to 24.35   | **** | <0.0001 |
| 1 nM Cr(VI) vs. 10 nM Cr(VI)   | -1.9   | -3.954 to 0.1541 | ns   | 0.0855  |
| 1 nM Cr(VI) vs. 100 nM Cr(VI)  | -16.8  | -18.85 to -14.75 | **** | <0.0001 |
| 1 nM Cr(VI) vs. Ampicilline    | 24.17  | 22.11 to 26.22   | **** | <0.0001 |
| 1 nM Cr(VI) vs. Tetraciline    | 24.03  | 21.98 to 26.09   | **** | <0.0001 |
| 10 nM Cr(VI) vs. 100 nM Cr(VI) | -14.9  | -16.95 to -12.85 | **** | <0.0001 |
| 10 nM Cr(VI) vs. Ampicilline   | 26.07  | 24.01 to 28.12   | **** | <0.0001 |
| 10 nM Cr(VI) vs. Tetraciline   | 25.93  | 23.88 to 27.99   | **** | <0.0001 |
| 100 nM Cr(VI) vs. Ampicilline  | 40.97  | 38.91 to 43.02   | **** | <0.0001 |
| 100 nM Cr(VI) vs. Tetraciline  | 40.83  | 38.78 to 42.89   | **** | <0.0001 |
| Ampicilline vs. Tetraciline    | -0.133 | -2.187 to 1.921  | ns   | >0.9999 |

#### ***Enterococcus faecalis* ATCC 29212**

|                                |        |                  |      |         |
|--------------------------------|--------|------------------|------|---------|
| Unexposed vs. 1 nM Cr(VI)      | -0.233 | -2.287 to 1.821  | ns   | 0.9994  |
| Unexposed vs. 10 nM Cr(VI)     | -6.167 | -8.221 to -4.113 | **** | <0.0001 |
| Unexposed vs. 100 nM Cr(VI)    | -12.33 | -14.39 to -10.28 | **** | <0.0001 |
| Unexposed vs. Ampicilline      | 23.33  | 21.28 to 25.39   | **** | <0.0001 |
| Unexposed vs. Tetraciline      | 24.3   | 22.25 to 26.35   | **** | <0.0001 |
| 1 nM Cr(VI) vs. 10 nM Cr(VI)   | -5.933 | -7.987 to -3.879 | **** | <0.0001 |
| 1 nM Cr(VI) vs. 100 nM Cr(VI)  | -12.1  | -14.15 to -10.05 | **** | <0.0001 |
| 1 nM Cr(VI) vs. Ampicilline    | 23.57  | 21.51 to 25.62   | **** | <0.0001 |
| 1 nM Cr(VI) vs. Tetraciline    | 24.53  | 22.48 to 26.59   | **** | <0.0001 |
| 10 nM Cr(VI) vs. 100 nM Cr(VI) | -6.167 | -8.221 to -4.113 | **** | <0.0001 |
| 10 nM Cr(VI) vs. Ampicilline   | 29.5   | 27.45 to 31.55   | **** | <0.0001 |
| 10 nM Cr(VI) vs. Tetraciline   | 30.47  | 28.41 to 32.52   | **** | <0.0001 |
| 100 nM Cr(VI) vs. Ampicilline  | 35.67  | 33.61 to 37.72   | **** | <0.0001 |
| 100 nM Cr(VI) vs. Tetraciline  | 36.63  | 34.58 to 38.69   | **** | <0.0001 |
| Ampicilline vs. Tetraciline    | 0.9667 | -1.087 to 3.021  | ns   | 0.7355  |
